# Supplementary material for: Identification and verification of prognostic cancer subtype based on multi-omics analysis for kidney renal papillary cell carcinoma
Source: Frontiers journal article supplement (doi:10.3389/fonc.2023.1169395), 2023-04-05

Figure S4

A

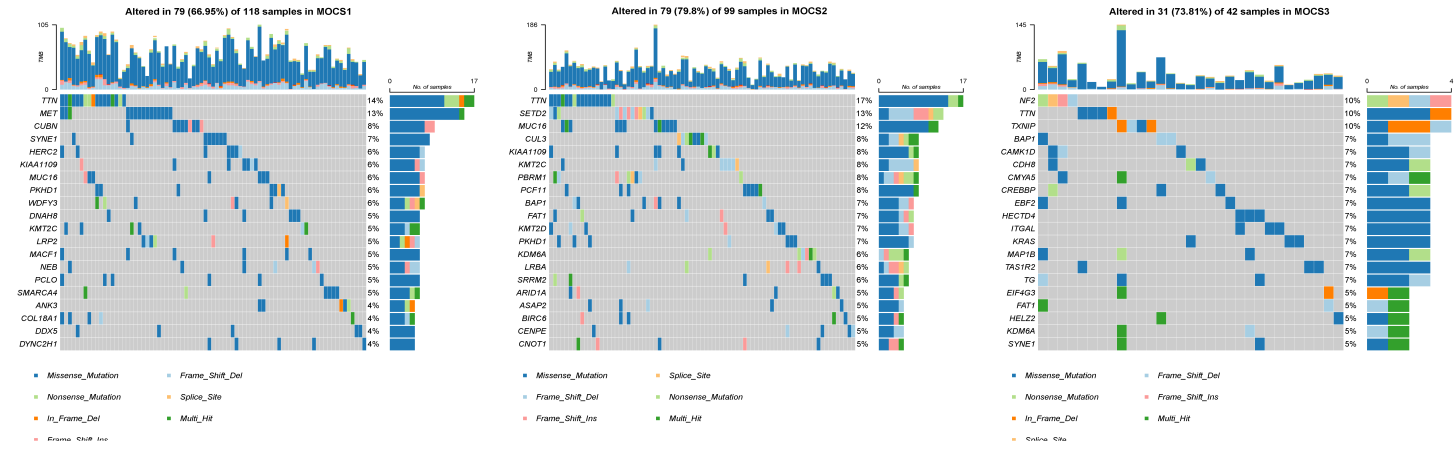

B

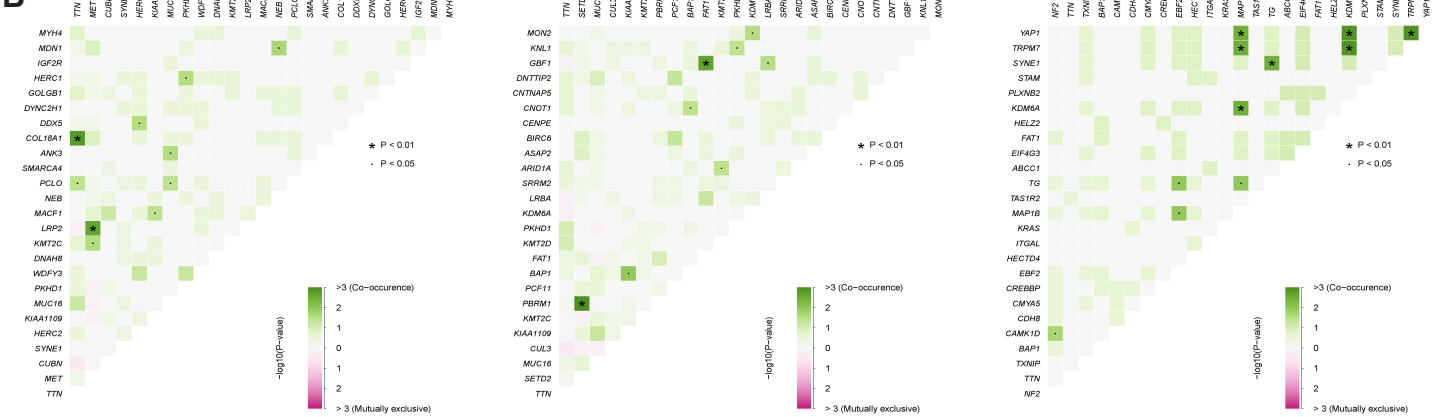

C

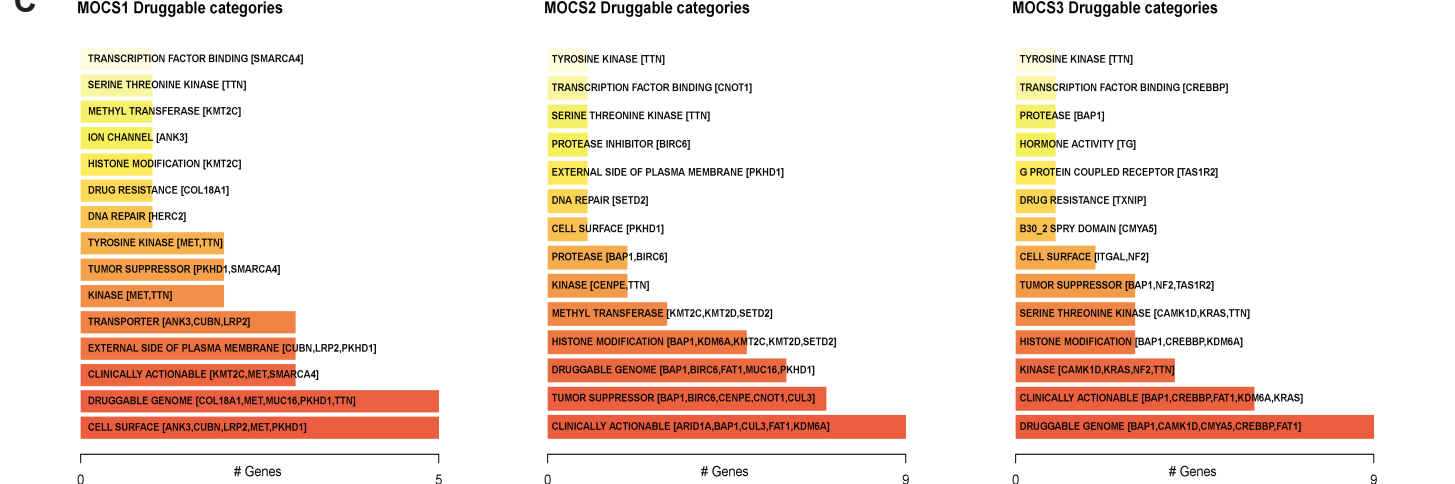

D

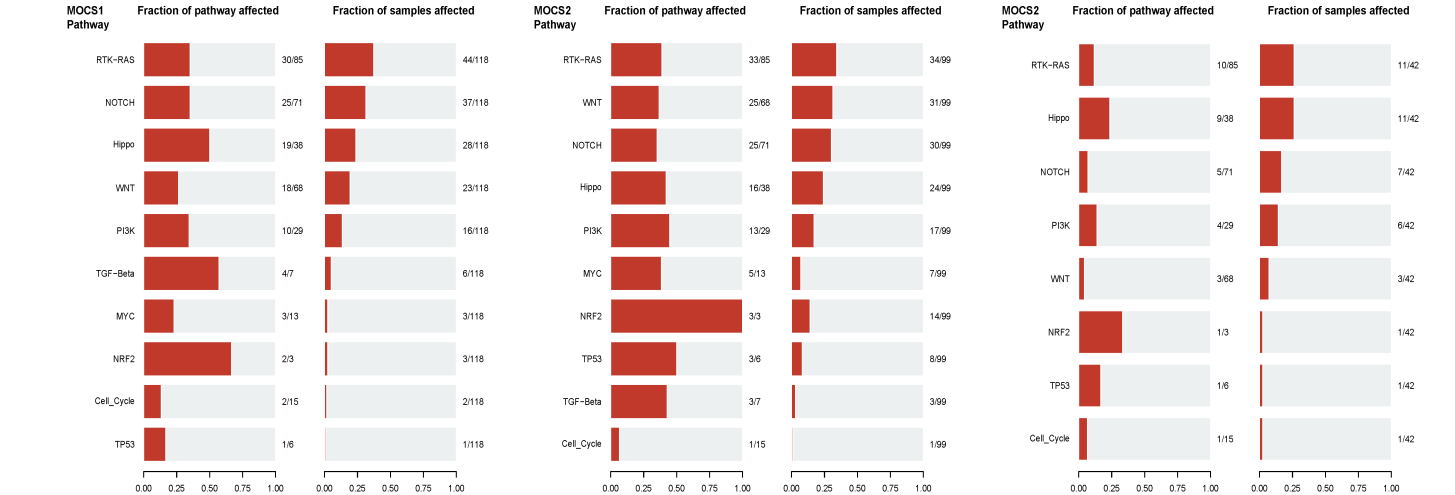

Supplement: Image_4.pdf [file Image_4.pdf]
